# Supplementary material for: Immersed Boundary Models for Quantifying Flow-Induced Mechanical Stimuli on Stem Cells Seeded on 3D Scaffolds in Perfusion Bioreactors
Source: PLoS Comput Biol. 2016 Sep 22;12(9):e1005108. doi: 10.1371/journal.pcbi.1005108 (PMC5033382; doi:10.1371/journal.pcbi.1005108)
Supplement: S1 Table — (XLS) [file pcbi.1005108.s009.xls]

## Sheet: Sheet1
Case	vin, Stokes (m/s)	vin , Navier-Stokes (m/s)	% Difference
B	0.00178763	0.00178955	-0.107
F	0.00110306	0.00110374	-0.0616
A	0.000215371	0.000214711	-0.306
T	0.00110306	0.00110374	-0.0616
