# Supplementary figures and images for: Immersed Boundary Models for Quantifying Flow-Induced Mechanical Stimuli on Stem Cells Seeded on 3D Scaffolds in Perfusion Bioreactors
Source: PLOS journal article supplement (doi:10.1371/journal.pcbi.1005108), 2016-09-22

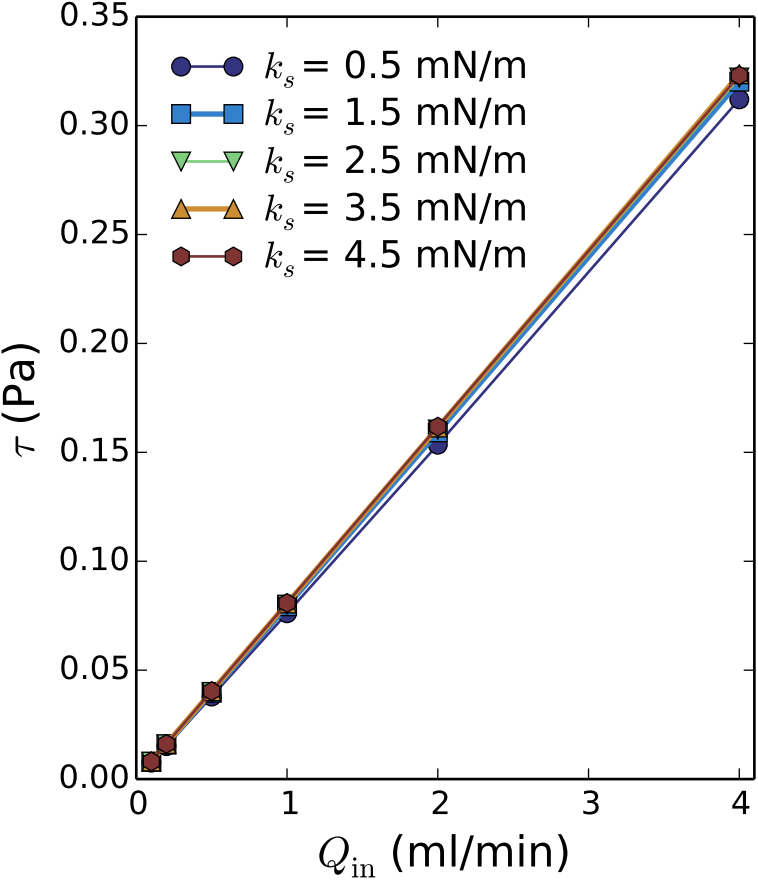

Supplement: S14 (10.1371/journal.pcbi.1005108.s014) [file journal.pcbi.1005108.s014]

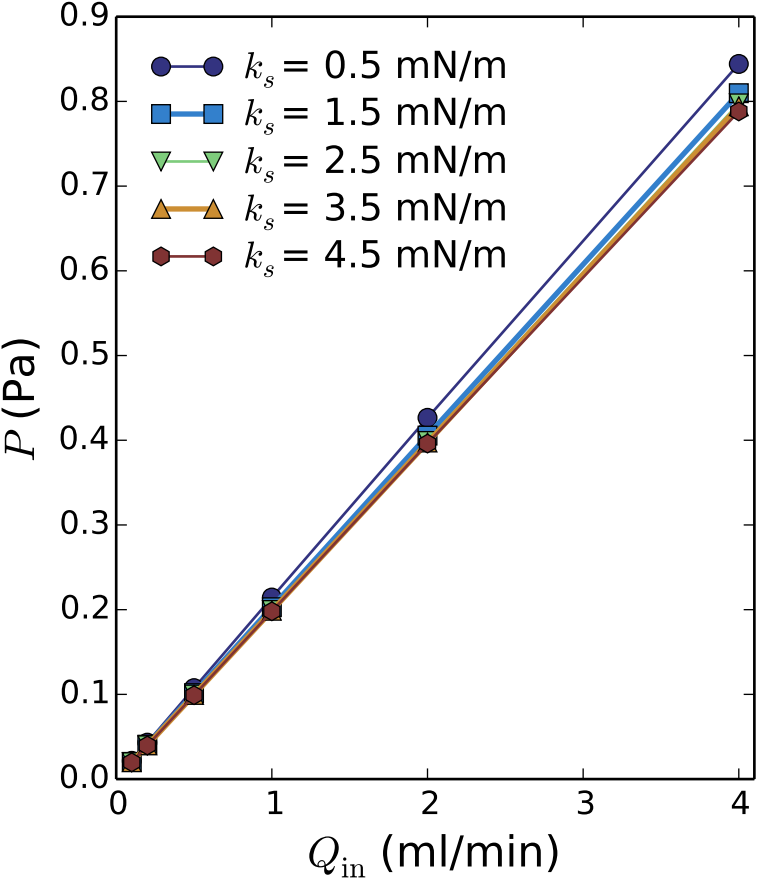

Supplement: S14 (10.1371/journal.pcbi.1005108.s014) [file journal.pcbi.1005108.s014]

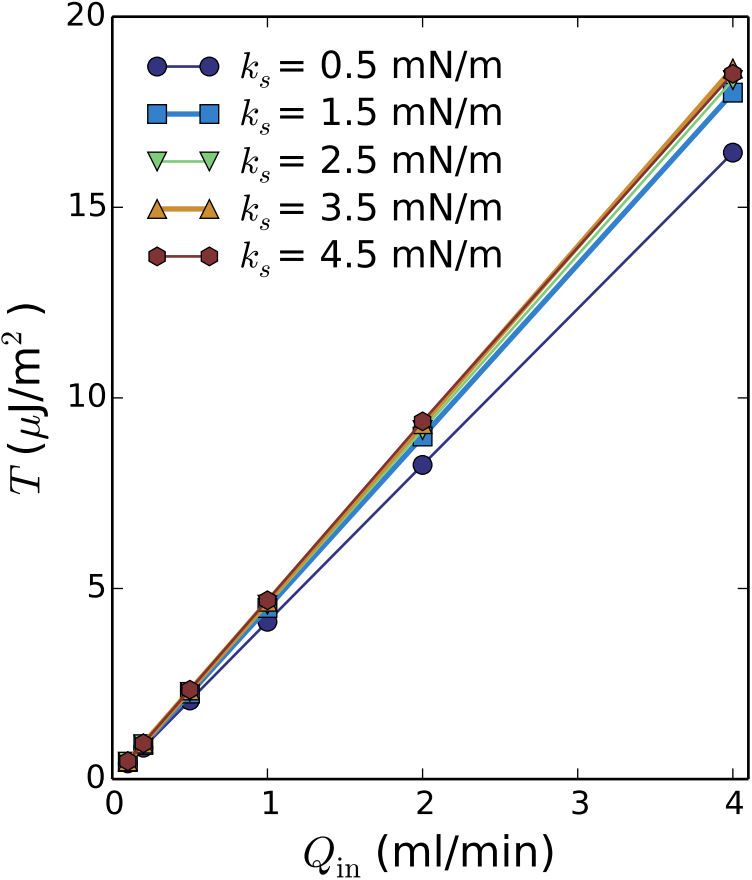

Supplement: S14 (10.1371/journal.pcbi.1005108.s014) [file journal.pcbi.1005108.s014]

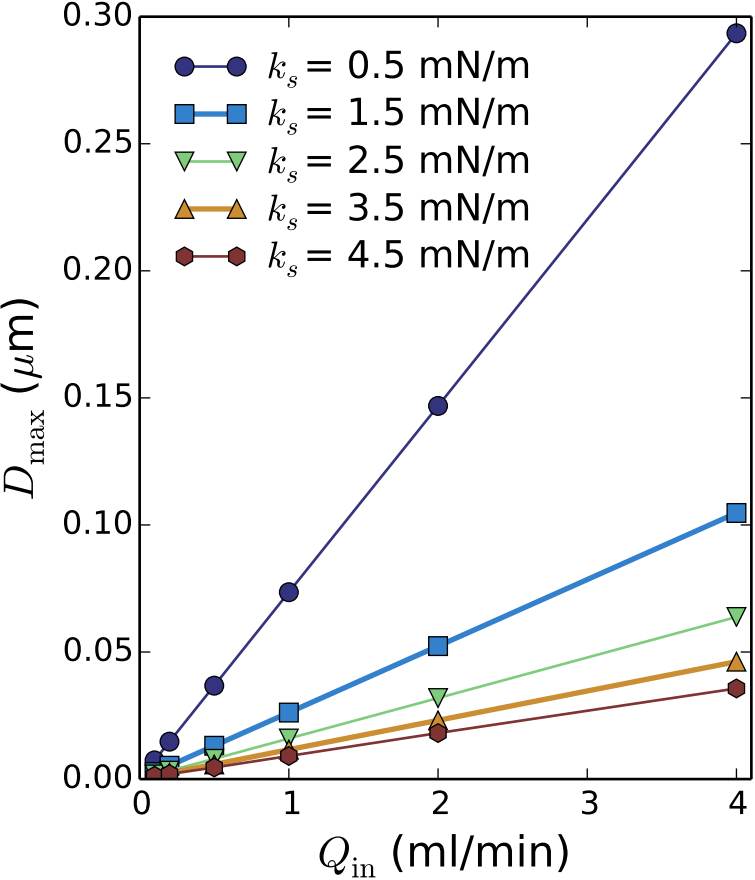

Supplement: S14 (10.1371/journal.pcbi.1005108.s014) [file journal.pcbi.1005108.s014]
